# Supplementary material for: Click Chemistry with Cell-Permeable Fluorophores Expands the Choice of Bioorthogonal Markers for Two-Color Live-Cell STED Nanoscopy
Source: MDPI journal article supplement (doi:10.3390/cells13080683), 2024-04-15
Supplement: s1 [file s1]

## Supporting Information

**Table S1.** Primers used for plasmid construction.

| Primer name           | Sequence (5'→3')                                                                                |
|-----------------------|-------------------------------------------------------------------------------------------------|
| NES-hMbPyIRS NheI fwd | TGTTAGGCTAGCGCCACCATGGCCTGCCCCGTGCCCCTG-CAGCTGCCCCCCCCTGGAGCGCCTGACCCTGGACGACAAG-AAACCCCTGGACGT |
| hMbPyIRS NotI rev     | TTGATAGCGGCCGCTCACAGGTTGGTGGAGAT                                                                |
| ACTB NheI fwd         | TTGATCGCTAGCATGGATGATGATATCGCCGC                                                                |
| ACTB BamHI rev        | GTTATCGGATCCTCAGAAGCATTTGCGGTGGA                                                                |
| ACTB K118TAG          | [Phos]-CCAAGGCCAACCGCGAGTAGATGACCCAGATCATG                                                      |
| ACTB BamHI fwd        | CGATATCGCGGATCCGATGATGATATCGCC                                                                  |
| ACTB NotI rev         | ATAGTTTAGCGGCCGCCTAGAAGCATTTGCG                                                                 |
| EGFP NheI fwd         | TGAATAGCTAGCATGGTGAGCAAGGGCGAG                                                                  |
| EGFP HindIII rev      | GATCCCAAGCTTCTTGTACAGCTCGTC                                                                     |
| mNeptune2 NheI fwd    | TGAATGGCTAGCATGGTGTCTAAGGGCGAA                                                                  |
| mGarnet NheI fwd      | TGTAATGCTAGCATGAACAGCCTGATCAAA                                                                  |
| mGarnet HindIII rev   | GTTATAAAGCTTCCCTCCGCCCAGGCCGGC                                                                  |

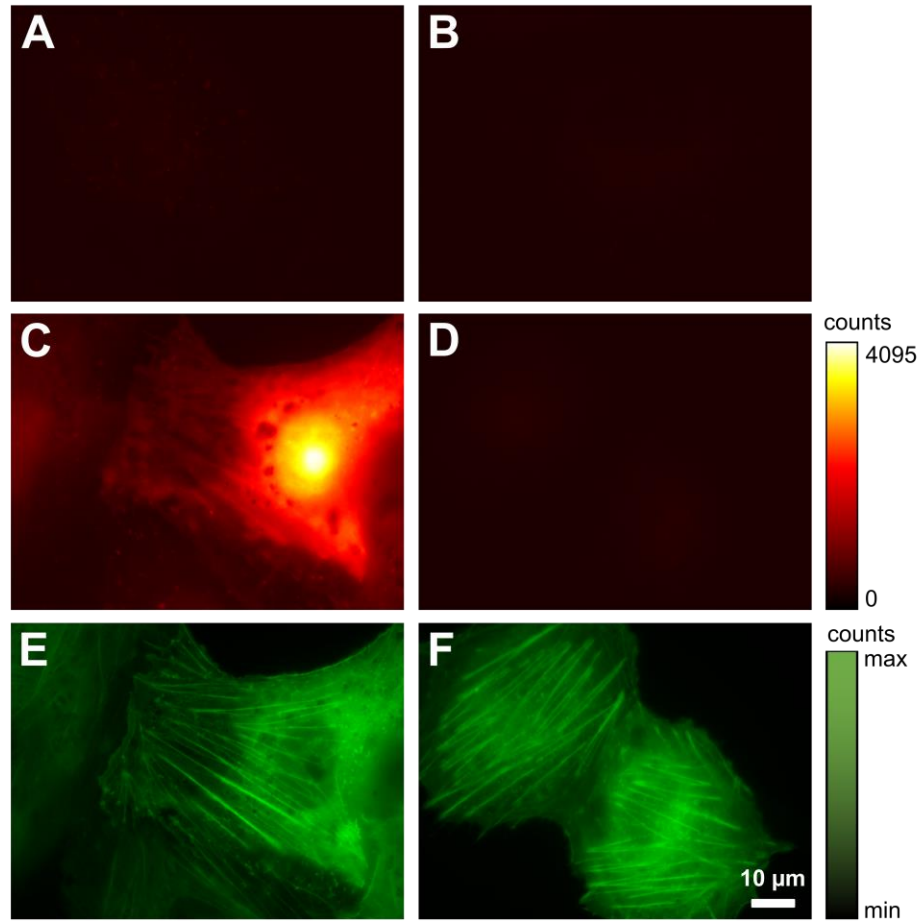

**Figure S1.** Comparison of background signal in living CV-1 cells with and without expression of tRNA/tRNA synthetase and incubation with TCO\*A. **(A,B)** Untransfected cells were incubated with (A) or without TCO\*A (B) before labeling with SiR-tetrazine. **(C,D)** Cells were transfected with plasmids encoding the tRNA/tRNA synthetase and EGFP-actin and incubated with (C) or without TCO\*A (D) before labeling with SiR-tetrazine. The same colormap was used for all images in A–D. **(E,F)** Fluorescence of EGFP-actin of the same cells as shown in (C,D) as a control for cellular transfection.

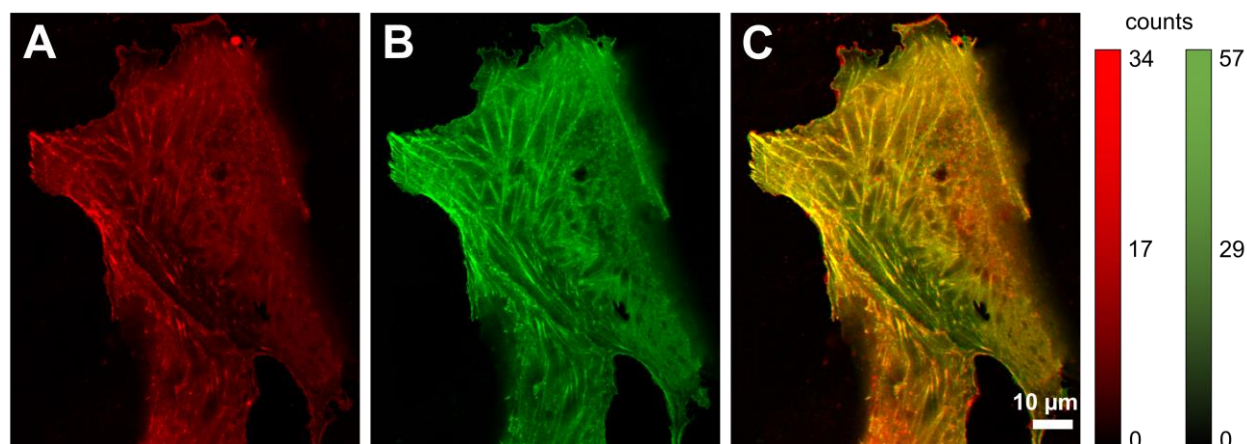

**Figure S2.** Actin structures of a living CV-1 cell. Cells were cotransfected with plasmids encoding EGFP-actin and actin<sup>K118TAG</sup> and incubated with TCO\*A. The cells were labeled with LIVE 610 click and imaged by confocal microscopy. **(A)** Fluorescence of LIVE 610 excited at 640 nm. **(B)** Fluorescence of EGFP excited at 488 nm. **(C)** Superposition of (A) and (B).

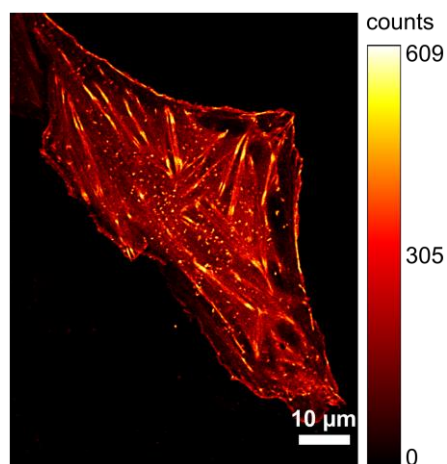

**Figure S3.** Fluorescence imaging of actin filaments click-labeled with LIVE 510. Confocal image of a living CV-1 cell expressing actin<sup>K118TAG</sup> which was labeled with LIVE 510 click. The fluorophore was excited with a 488 nm laser.

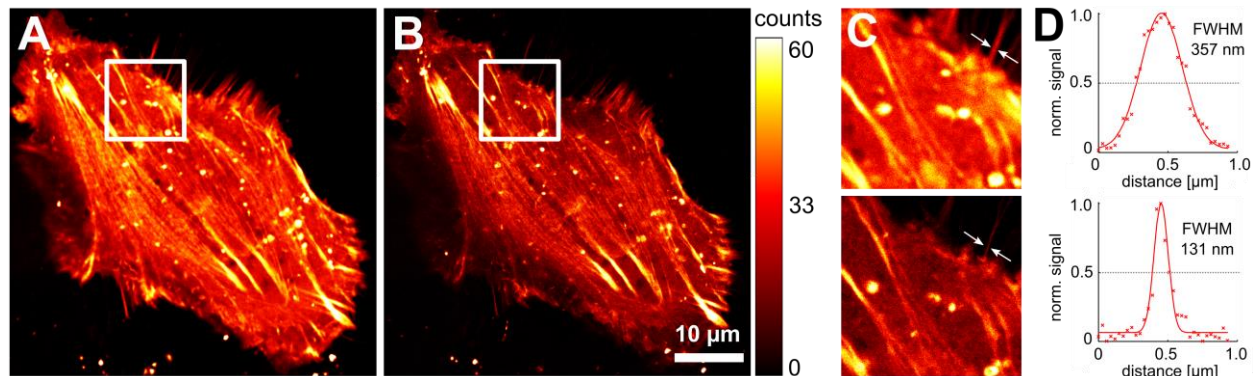

**Figure S4.** Fluorescence imaging of actin filaments click-labeled with LIVE 460L. **(A)** Confocal and **(B)** STED image of a living CV-1 cell expressing actin<sup>K118TAG</sup> which was labeled with LIVE 460L click. **(C)** The upper panel shows a close-up of the confocal image (A), while the lower panel shows the close-up of the STED image (B). **(D)** Line profiles of the filament marked with an arrow in the confocal (upper panel) and STED image (lower panel) of (C). The fluorophore was excited with a 488 nm laser. For STED imaging, a 775 nm depletion laser was used.

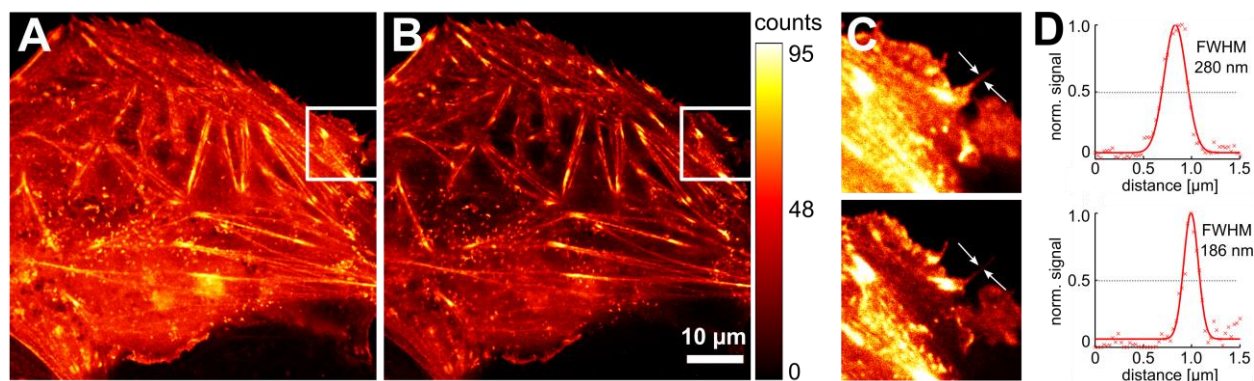

**Figure S5.** Fluorescence imaging of actin filaments click-labeled with LIVE 550. **(A)** Confocal and **(B)** STED image of a living CV-1 cell expressing actin<sup>K118TAG</sup> which was labeled with LIVE 550 click. **(C)** The upper panel shows a close-up of the confocal image (A), while the lower panel shows the close-up of the STED image (B). **(D)** Line profiles of the filament marked with an arrow in the confocal (upper panel) and STED image (lower panel) of (C). The fluorophore was excited with a 561 nm laser. For STED imaging, a 775 nm depletion laser was used.

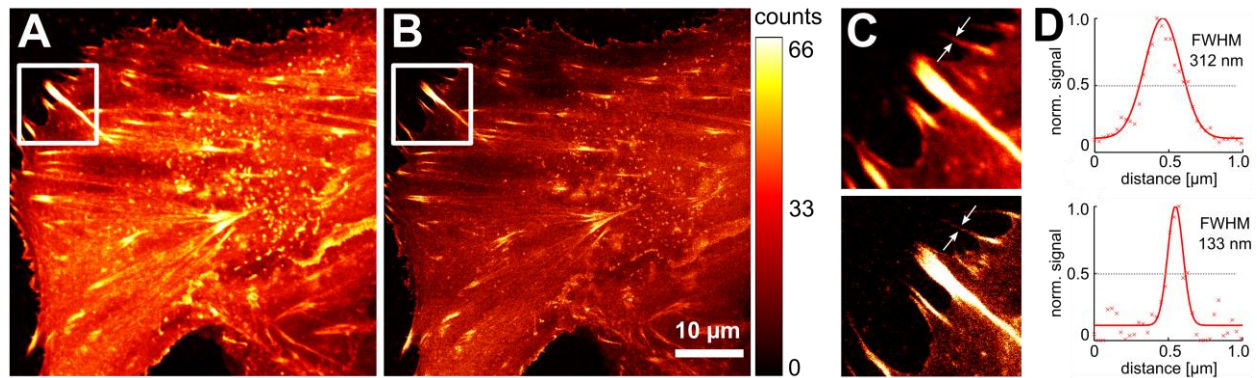

**Figure S6.** Fluorescence imaging of actin filaments click-labeled with LIVE 610. **(A)** Confocal and **(B)** STED image of a living CV-1 cell expressing actin<sup>K118TAG</sup> which was labeled with LIVE 610 click. **(C)** The upper panel shows a close-up of the confocal image (A), while the lower panel shows the close-up of the STED image (B). **(D)** Line profiles of the filament marked with an arrow in the confocal (upper panel) and STED image (lower panel) of (C). The fluorophore was excited with a 640 nm laser. For STED imaging, a 775 nm depletion laser was used.

**Video S1.** Two-color long-term STED imaging of actin and mitochondria. Living CV-1 cells expressing actin<sup>K118TAG</sup> and OMP25-SNAP were incubated with TCO\*A and labeled with LIVE 550 click and LIVE 610 SNAP. The dyes were excited with a 561 nm and a 640 nm laser, respectively, and depleted with a 775 nm STED laser. Images were recorded every 30 s for a period of 30 min.
